# Supplementary material for: A549 Cell-Covered Electrodes as a Sensing Element for Detection of Effects of Zn2+ Ions in a Solution
Source: MDPI journal article supplement (doi:10.3390/nano12193493), 2022-10-06

# Supplementary data:

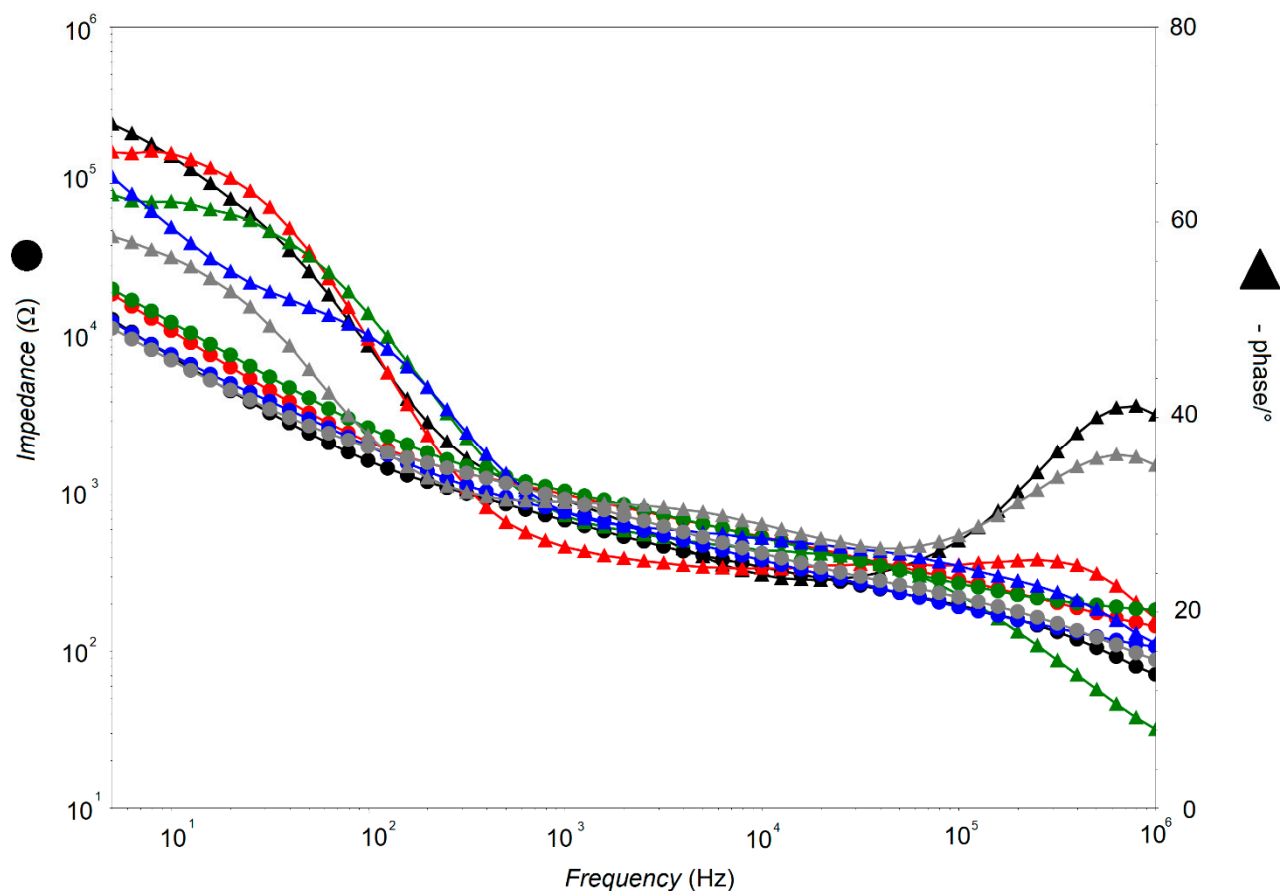

**Figure S1.** Bode diagram: A simultaneous representation of both total impedance (circles) and phase response (triangles) is shown. The color selection is the same as for Figure 7. The data for different concentrations of 9  $\mu\text{g/mL}$  (red label) 40  $\mu\text{g/mL}$  (green label), 200  $\mu\text{g/mL}$  (blue label) are presented as well as for negative sample (black label) and blank stainless-steel sample that counts as the positive control (grey label).

**Table S1.** Shows surface coverage and morphology of cells in the presence of a different concentration of  $\text{ZnCl}_2$  as a chemical using SEM.

| The concentration of $\text{ZnCl}_2$ as a toxic compound | Surface Coverage(X100) | Shape of Cells(X500) | Single cell Example(X1000) |
|----------------------------------------------------------|------------------------|----------------------|----------------------------|
| Control                                                  |                        |                      |                            |
| 10 $\mu\text{g/mL}$ $\text{ZnCl}_2$                      |                        |                      |                            |
| 20 $\mu\text{g/mL}$ $\text{ZnCl}_2$                      |                        |                      |                            |
| 30 $\mu\text{g/mL}$ $\text{ZnCl}_2$                      |                        |                      |                            |
| 40 $\mu\text{g/mL}$ $\text{ZnCl}_2$                      |                        |                      |                            |

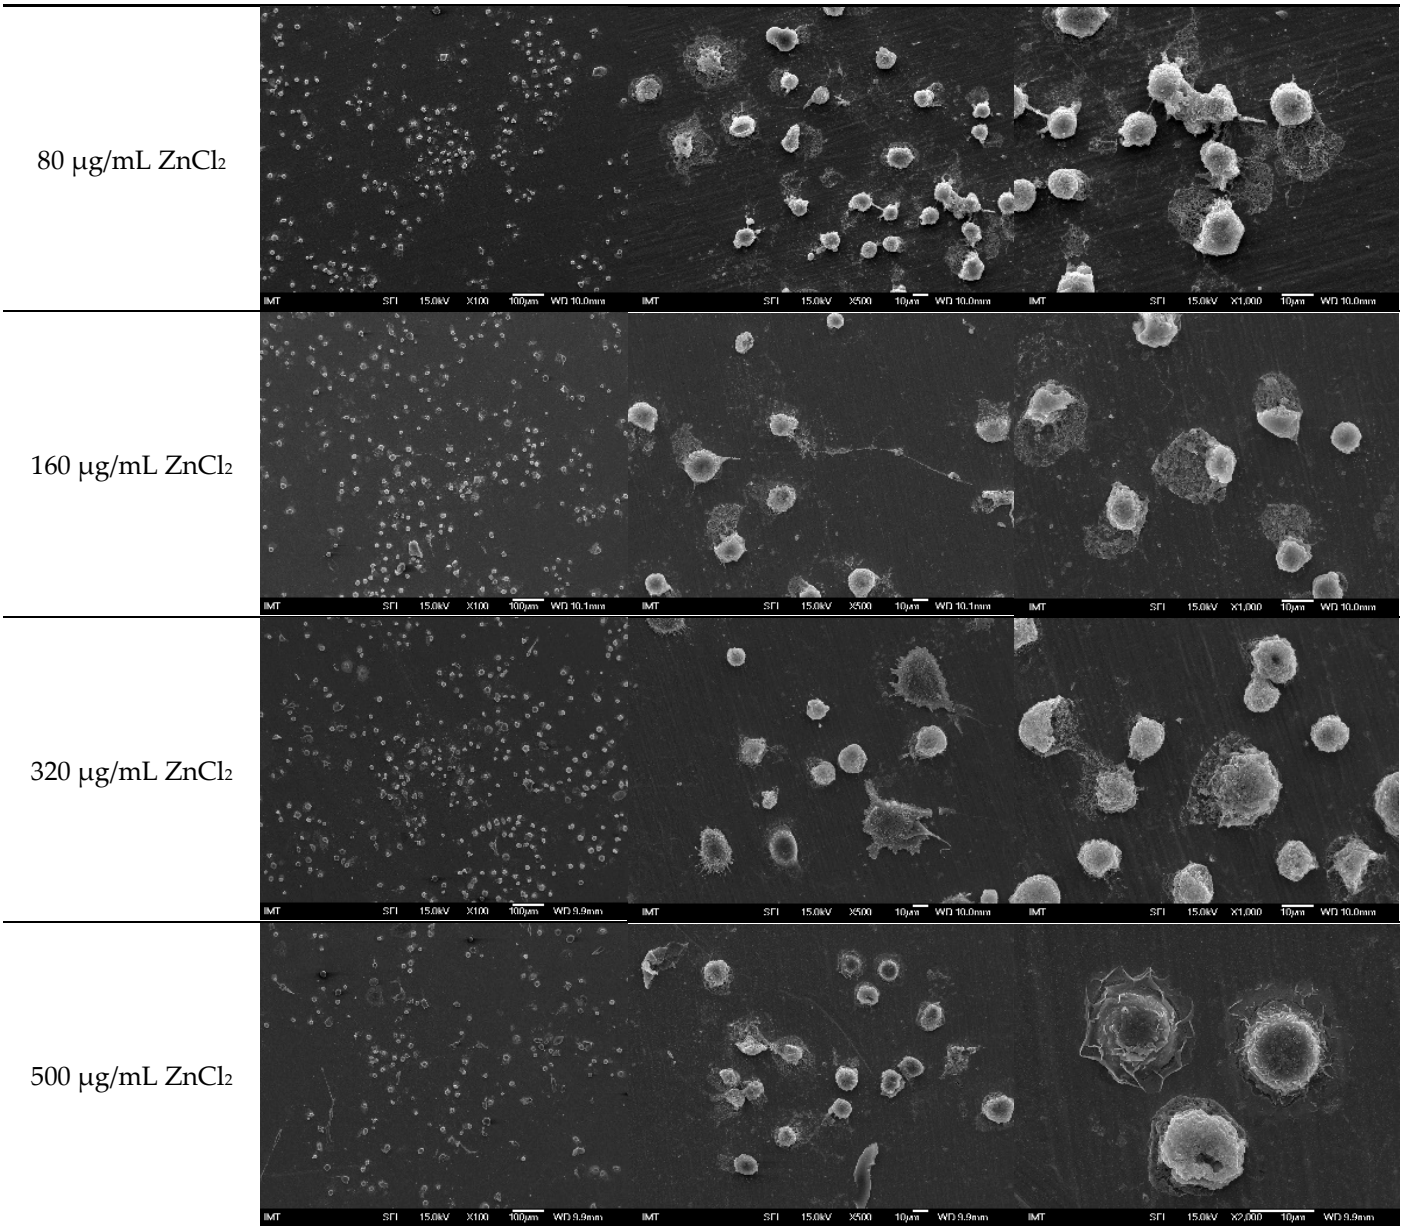

Supplement: s1 [file s1]
